# Supplementary material for: Targeted killing of myofibroblasts by biosurfactant di-rhamnolipid suggests a therapy against scar formation
Source: PubMed Central journal article supplement (PMC5128858; doi:10.1038/srep37553), 2016-11-30
Supplement: srep37553-s1.pdf [file srep37553-s1.pdf]

Supplementary data

# **Targeted killing of myofibroblasts by biosurfactant di-rhamnolipid suggests a therapy against scar formation**

Chong Shen<sup>1</sup>, Lifang Jiang<sup>1</sup>, Huawei Shao<sup>2</sup>, Chuangang You<sup>2</sup>,  
Guoliang Zhang<sup>3</sup>, Sitong Ding<sup>1</sup>, Tingwei Bian<sup>1</sup>, Chunmao Han<sup>2</sup>, Qin  
Meng<sup>1,\*</sup>

# Fig S1

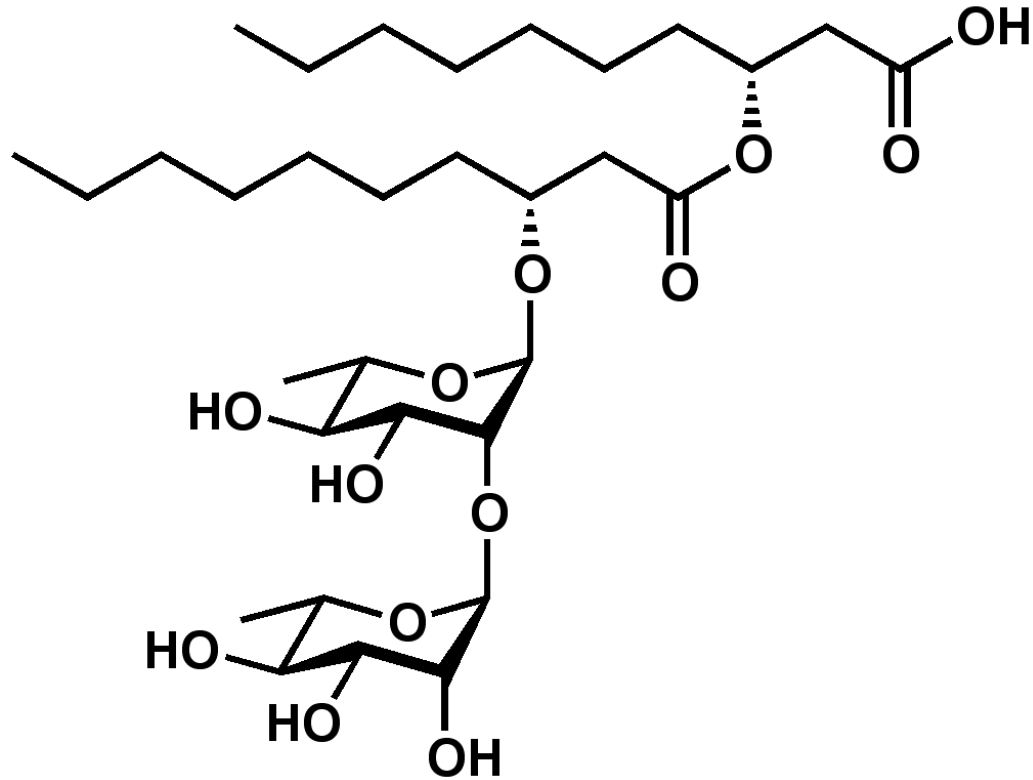

Fig S1. Chemical structure of di-rhamnolipid.

# Fig S2

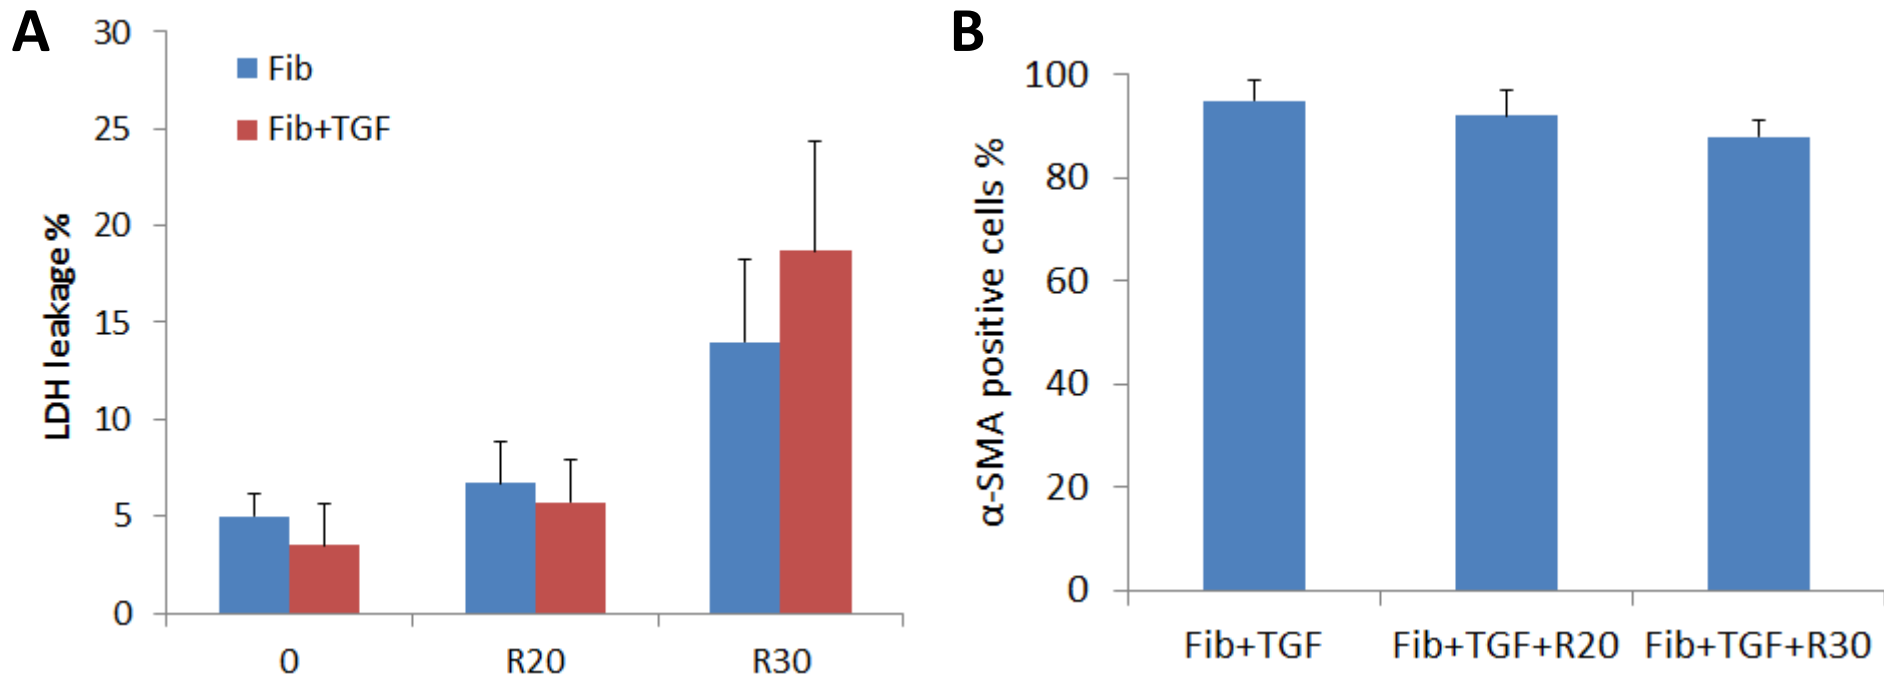

Fig S2. Fibroblasts were cotreated by RHA and TGF- $\beta$ 1. (A) RHA toxicity on fibroblasts with or without TGF- $\beta$ 1 treatment. (B) percent of  $\alpha$ -SMA positive cells after TGF- $\beta$ 1 stimulation.

# Fig S3

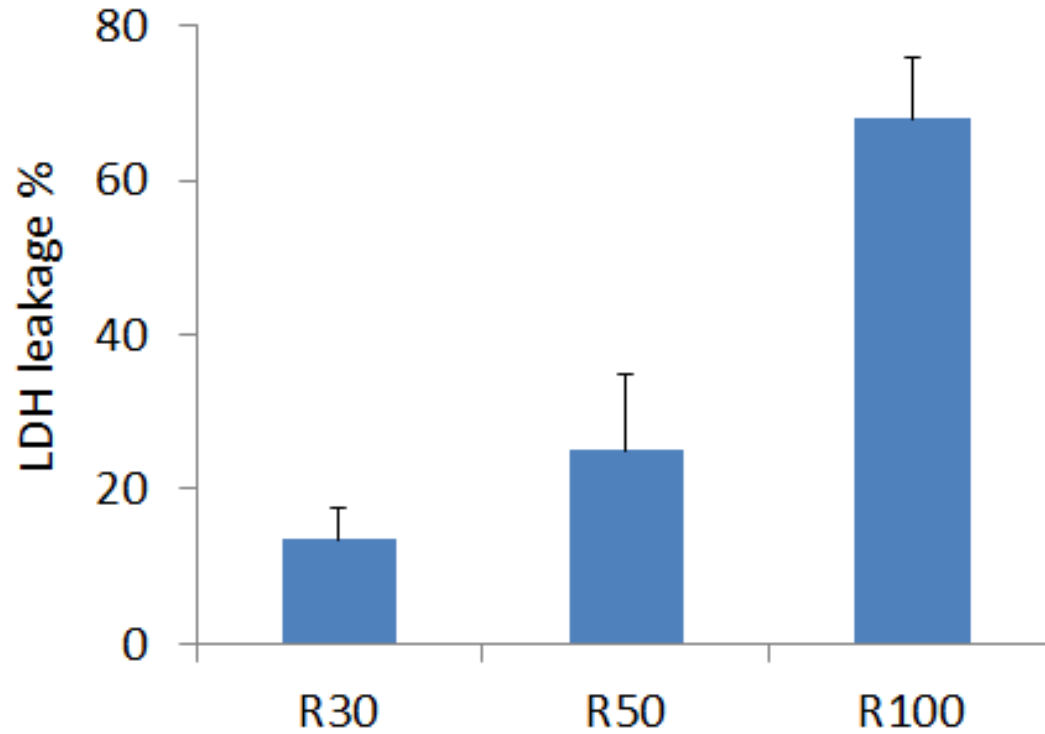

Fig S3. LDH leakage of fibroblasts after treatment with RHA at 30, 50 and 100 mg/L for 24 h.

# Fig S4

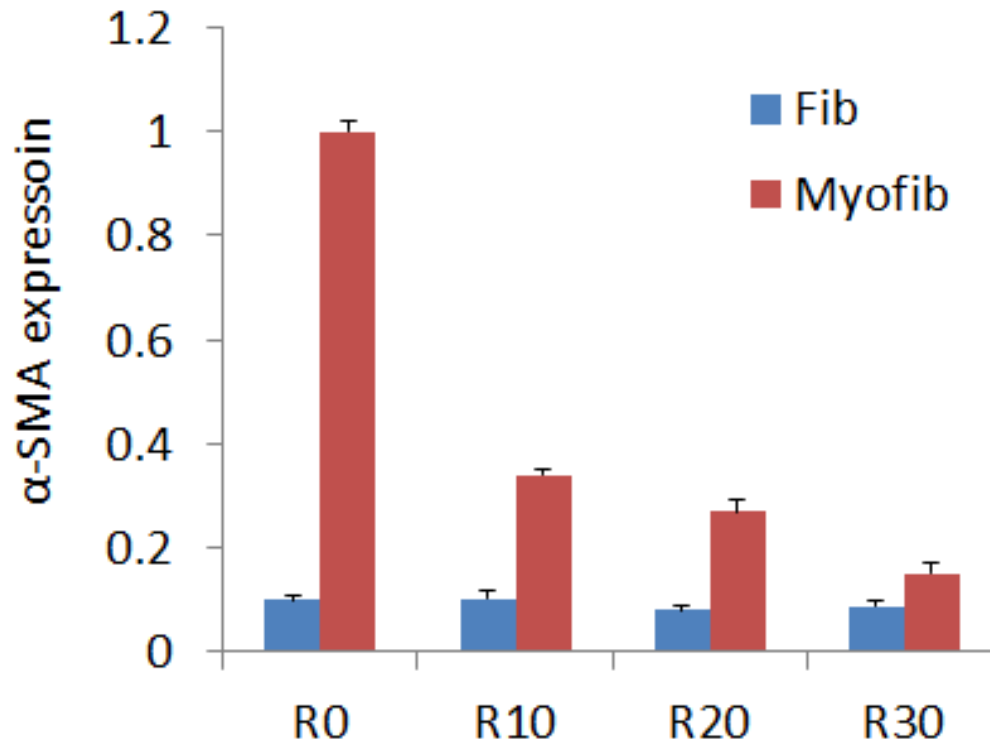

Fig S3. The  $\alpha$ -SMA expression after RHA treatment in Fig 3A was quantified by Image J.

# Fig S5

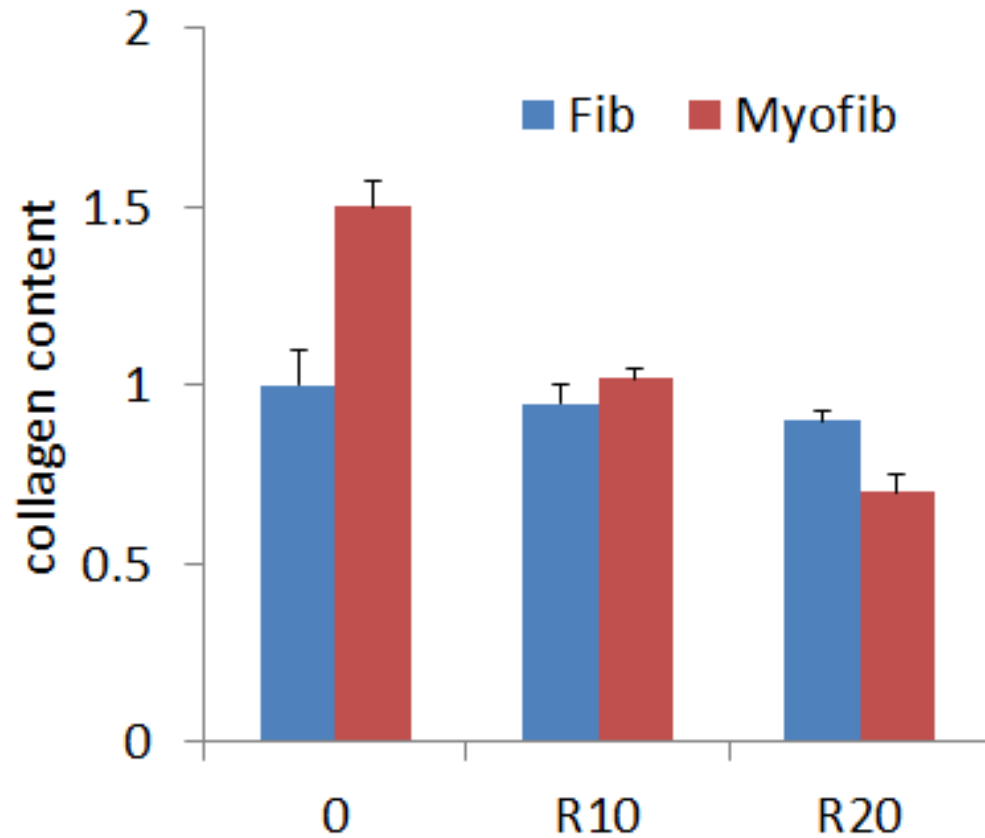

Fig S5. The collagen content after RHA treatment in Fig 4c was quantified by Image J.

# Fig S6

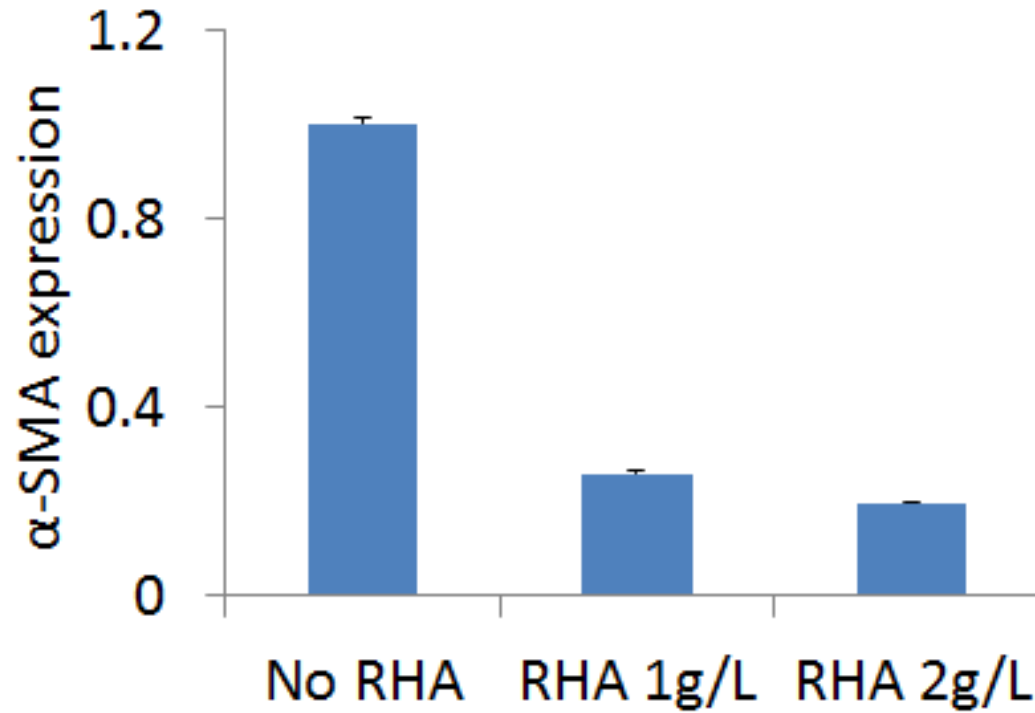

Fig S6. The  $\alpha$ -SMA expression after RHA treatment in Fig 8 was quantified by Image J.
